# Supplementary material for: Template-free microwave-assisted synthesis of ZnO hollow microspheres and their application in gas sensing
Source: Royal Society of Chemistry journal article supplement (doi:10.1039/c2ce26539g), 2012-11-29
Supplement: c2ce26539g.pdf [file c2ce26539g.pdf]

## Supplementary Information

### Template-free microwave-assisted synthesis of ZnO hollow microspheres and their application in gas sensing

Xiaowei Li<sup>a</sup>, Peng Sun<sup>a</sup>, Tianlin Yang<sup>a</sup>, Jing Zhao<sup>a</sup>, Zhenyu Wang<sup>a</sup>, Weinan Wang<sup>a</sup>,  
Yinping Liu<sup>a</sup>, Geyu Lu<sup>\*a</sup> and Yu Du<sup>\*b</sup>

<sup>a</sup> State Key Laboratory on Integrated Optoelectronics, College of Electronic Science and Engineering, Jilin University,

Changchun, 130012, People's Republic of China. Fax: +86 431 85167808; Tel: +86 431 85167808; E-mail: luyg@jlu.edu.cn

<sup>b</sup> Department of Applied Physics, Shenzhen University, Shenzhen 518060, People's Republic of China. E-mail: duy@szu.edu.cn

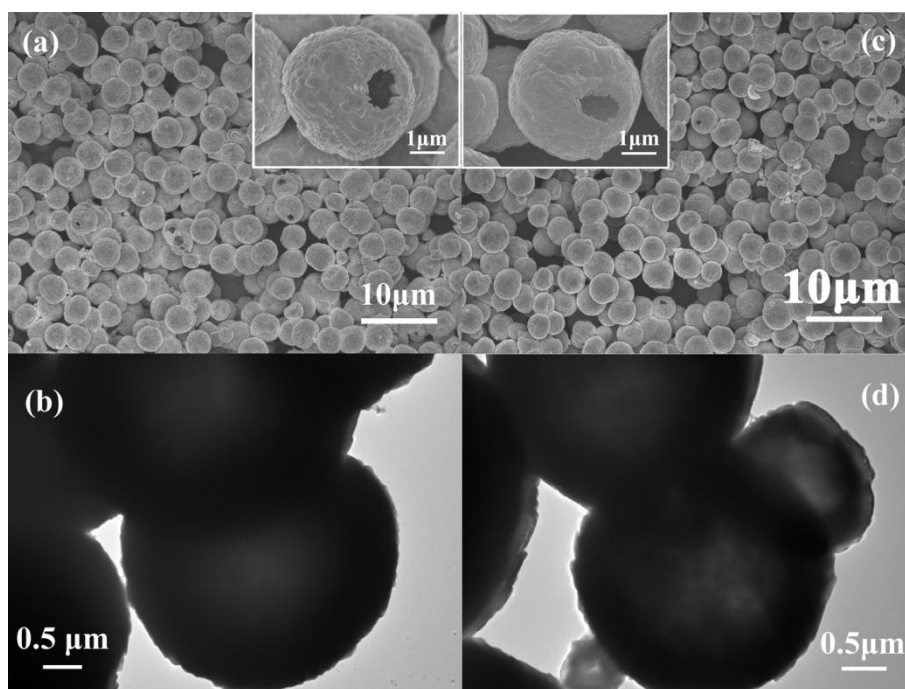

**Fig. S1** Typical SEM and TEM images of uncalcined ZnO (a-b) and calcined ZnO (c-d) hollow microsphere.

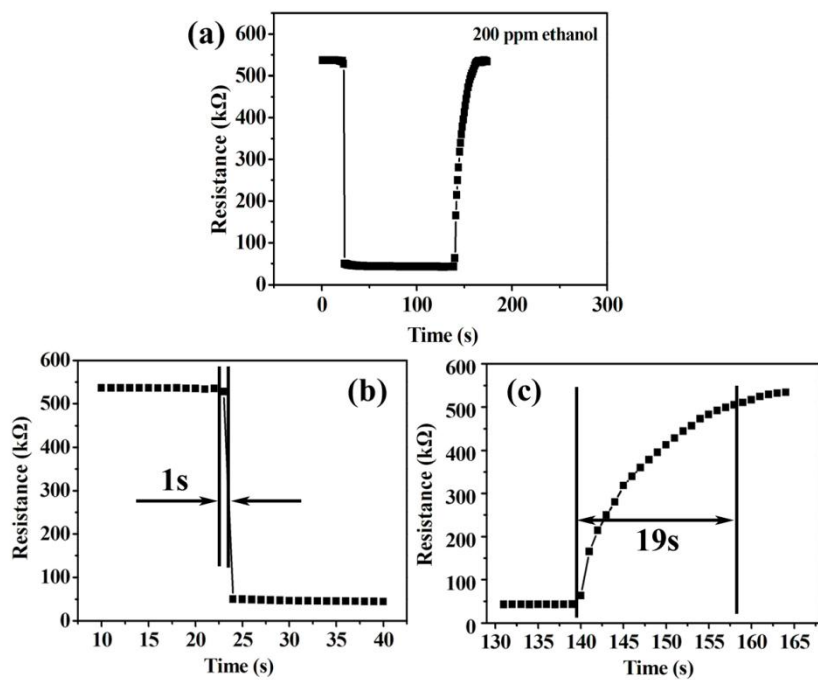

**Fig. S2** Response transient of the sensor to 200 ppm ethanol.
